# Supplementary material
Source: PubMed Central journal article supplement (PMC4407695)
Supplement: NIHMS601964-supplement-01.pdf [file NIHMS601964-supplement-01.pdf]

## Supplemental Materials

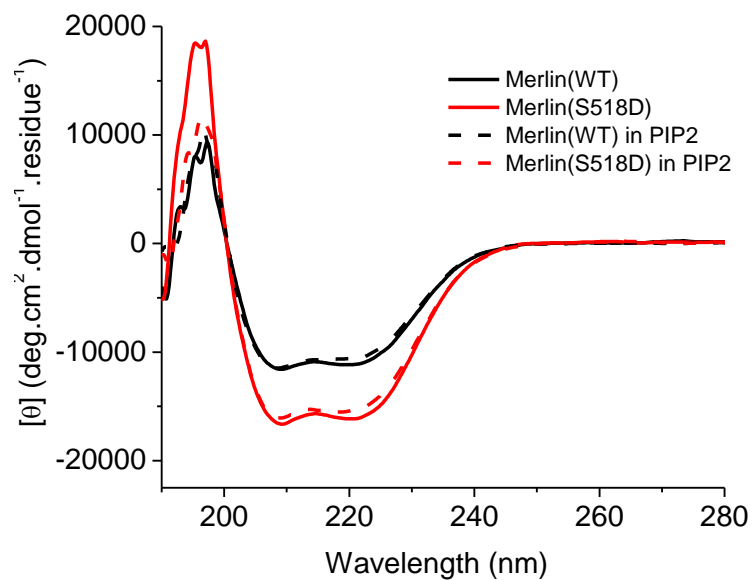

**Figure S1. CD spectra of Merlin(wt) and Merlin(S518D) in solution and in PIP2.** The protein concentrations are 0.182 mg/ml (2.6 nM) for Merlin(wt) and 0.189 mg/ml (2.7 nM) for Merlin(S518D). For PIP2 binding, the protein to lipid molar ratio is 1:50. The CD experiments were performed at 25°C.

**Table S1**

Results after deconvolution of CD spectra for different mutants of merlin.  
Values in parenthesis show percent of secondary structure in the presence of PIP2 at protein:PIP2=1:50 molar ratio.

|                                       | <b><math>\alpha</math>-Helix%</b> | <b><math>\beta</math>-Sheet%</b> | <b>Turns%</b> | <b>disordered%</b> |
|---------------------------------------|-----------------------------------|----------------------------------|---------------|--------------------|
| <b>Merlin (WT)</b>                    | 42.00 (42.00)                     | 11.00 (10.00)                    | 19.00 (19.00) | 27.00 (28.00)      |
| <b>Merlin (S518D)</b>                 | 64.00 (54.00)                     | 9.00 (18.00)                     | 21.00 (13.00) | 8.00 (15.00)       |
| <b>Merlin (AR)</b>                    | 61.00 (59.00)                     | 11.00 (15.00)                    | 11.00 (14.00) | 18.00 (13.00)      |
| <b>Merlin (<math>\Delta</math>EL)</b> | 48.00 (47.00)                     | 15.00 (15.00)                    | 17.00 (18.00) | 20.00 (21.00)      |

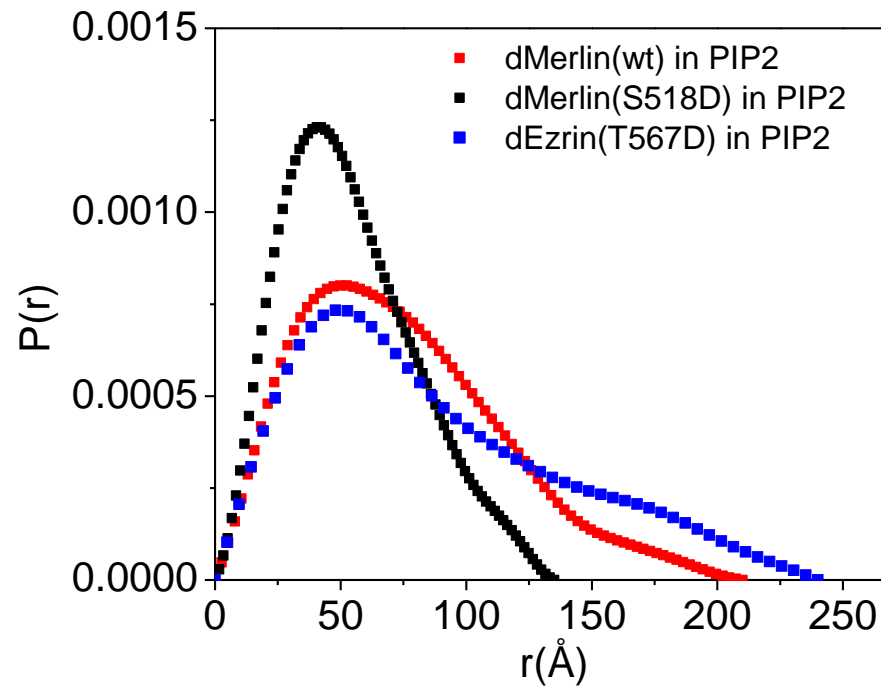

**Figure S2.** Comparing  $P(r)$  function of dMerlin(wt), dMerlin(S518D), and dEzrin(T567D) in PIP2
